# Supplementary material
Source: publisher site journal article supplement (https://www.dovepress.com/article/590267)
Supplement: Supplementary file 1 [file 590267%20Revised%20Supplementary%20Materials.docx]

Supplemental Table 1: General Knowledge Scores by Substance Use and Sexual Activity Categories

|  | Cannabis | | Alcohol | | Ever Sexual Activity | |
| --- | --- | --- | --- | --- | --- | --- |
| User  (N=50) | Non-User  (N=53) | User  (N=56) | Non-User  (N=47) | Yes  (N=63) | No  (N=38) |
| Cannabis | 2.6 ± 0.9 | 3.0 ± 1.0 | 2.9 ± 1.0 | 2.7 ± 1.0 | 2.8 ± 1.0 | 2.8 ± 1.0 |
| Alcohol | 4.5 ± 1.2 | 3.9 ± 1.4* | 4.6 ± 1.3 | 3.8 ± 1.3* | 4.5  1.2 | 3.7  1.4* |
| Goal Pregnancy HbA1c Correct | 13 (26.0) | 8 (15.1) | 17 (30.4) | 4 (8.5)* | 16 (25.3) | 5 (13.2) |

Data are presented as mean ± standard deviation or n (%)

* p-value <0.05 for difference between groups
